# Supplementary material
Source: PubMed Central journal article supplement (PMC3478048)
Supplement: supp_mcs185_mcs185supp.pdf [file supp_mcs185_mcs185supp.pdf]

SUPPLEMENTARY DATA

FIG. S1. Linear regression of the relative DNA ratios and DNA ploidy levels. The slope of the regression is indicated.

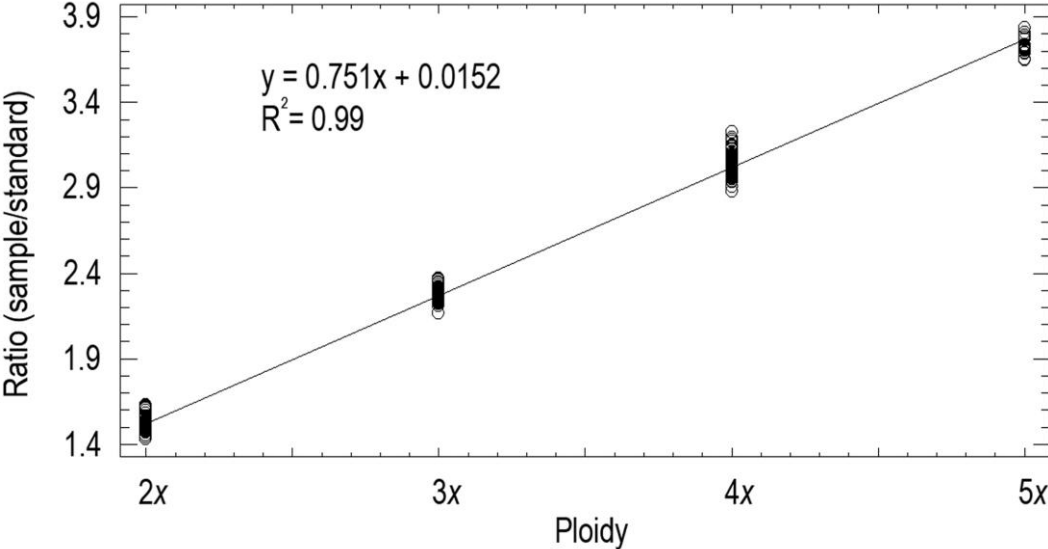

FIG. S2. Distribution of the relative DNA contents (DNA ratios) in *Sorbus* grouped under different taxonomic criteria. (A) Diploid parental *S. aria*, *S. aucuparia* and *S. torminalis*; (B) Diploid species and homoploid hybrids; (C) triploid taxa; (D) tetraploid taxa.

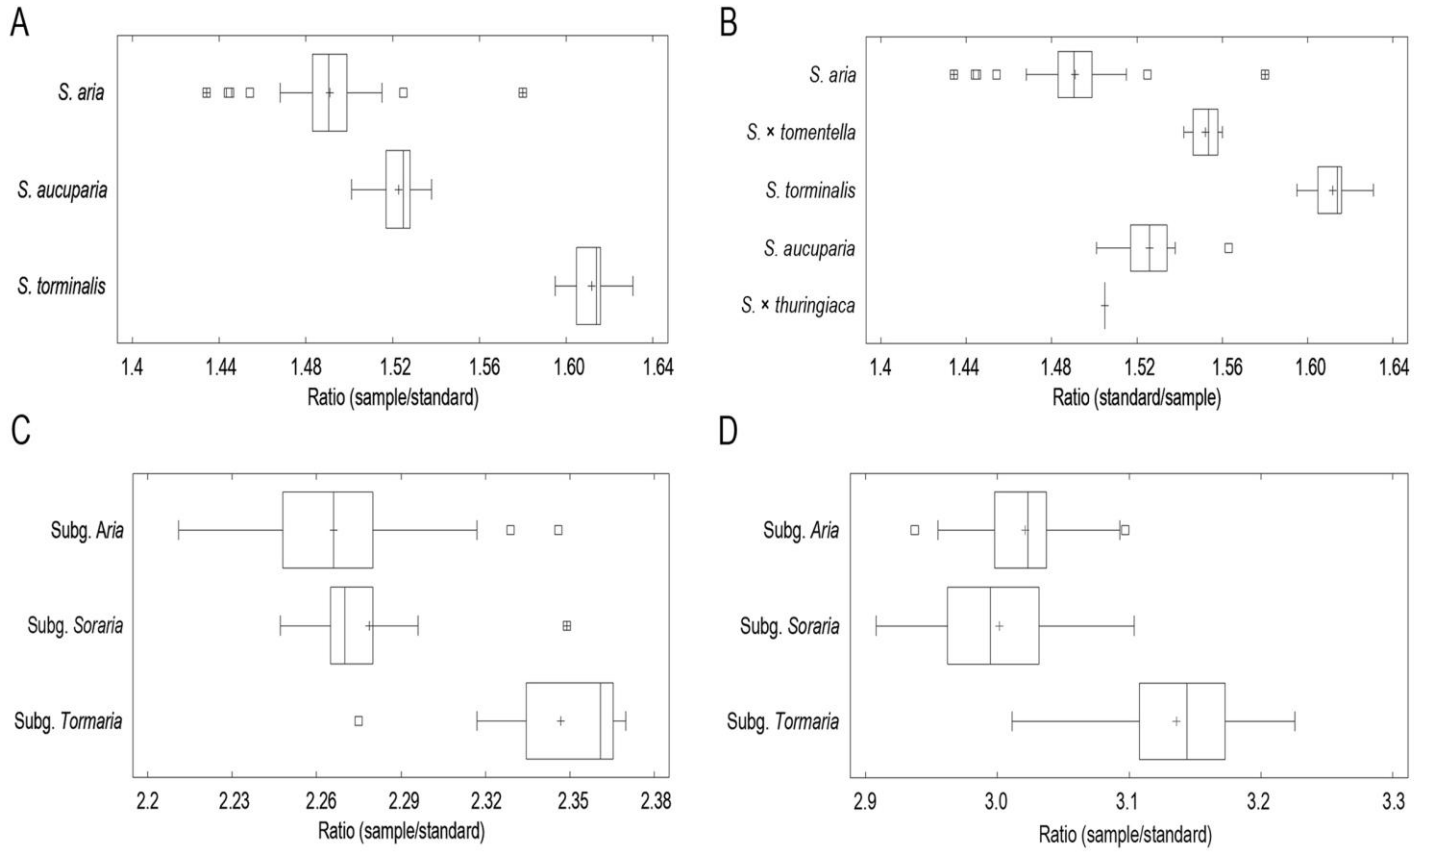

TABLE S1. Detailed information about the taxa studied including localities, collectors and flow cytometric results.

|  |              |
|--|--------------|
|  | Allien taxa  |
|  | Dubious taxa |

| Flow cytometry number | Species                 | Locality                                                                       | collector                                        | Ratio FCM (standard/sample) | DNA Ploidy      |
|-----------------------|-------------------------|--------------------------------------------------------------------------------|--------------------------------------------------|-----------------------------|-----------------|
| FC338                 | <i>Sorbus admonitor</i> | Watersmeet                                                                     | T. Rich & S. Whild                               | 3.138                       | 4x = tetraploid |
| FC339                 | <i>Sorbus admonitor</i> | Watersmeet                                                                     | T. Rich & S. Whild                               | 3.226                       | 4x = tetraploid |
| FC340                 | <i>Sorbus admonitor</i> | Watersmeet                                                                     | T. Rich & S. Whild                               | 3.173                       | 4x = tetraploid |
| FC343                 | <i>Sorbus admonitor</i> | Watersmeet                                                                     | T. Rich & S. Whild                               | 3.152                       | 4x = tetraploid |
| FC388                 | <i>Sorbus americana</i> | Canada. Québec, 49°00'N, 74°00'W. Loc. 21. Desmaraisville. Road 113, NW-laïta. | M. Christenhusz                                  | 1.533                       | 2x = diploid    |
| FC002                 | <i>Sorbus anglica</i>   | The Plain, Leigh Woods                                                         | T. C. G. Rich, L. Houston, S. Ludwig, I. Trotman | 2.997                       | 4x = tetraploid |
| FC119b                | <i>Sorbus anglica</i>   | Symonds Yat, west side                                                         | M. Fay, J. P. Moscardo, S. Clermont, T. Rich     | 3.006                       | 4x = tetraploid |
| FC150                 | <i>Sorbus anglica</i>   | Coldwell Rocks, Ship Rock                                                      | M. Fay, J. P. Moscardo, S. Clermont, T. Rich     | 2.956                       | 4x = tetraploid |
| FC151                 | <i>Sorbus anglica</i>   | Coldwell Rocks, Ship Rock                                                      | M. Fay, J. P. Moscardo, S. Clermont, T. Rich     | 2.967                       | 4x = tetraploid |
| FC170                 | <i>Sorbus anglica</i>   | Craig y Cilau NNR                                                              | T. C. G. Rich                                    | 3.026                       | 4x = tetraploid |
| FC180                 | <i>Sorbus anglica</i>   | Craig y Cilau NNR                                                              | T. C. G. Rich                                    | 2.951                       | 4x = tetraploid |
| FC209                 | <i>Sorbus anglica</i>   | Craig y Cilau NNR                                                              | T. C. G. Rich                                    | 2.991                       | 4x = tetraploid |
| FC210                 | <i>Sorbus anglica</i>   | Pwll-du Quarry, Govilon                                                        | T. C. G. Rich                                    | 2.960                       | 4x = tetraploid |
| FC216                 | <i>Sorbus anglica</i>   | Cwm Clydach NNR area                                                           | T. C. G. Rich                                    | 2.94                        | 4x = tetraploid |
| FC220                 | <i>Sorbus anglica</i>   | Cwm Clydach NNR                                                                | T. C. G. Rich                                    | 2.96                        | 4x = tetraploid |
| FC302                 | <i>Sorbus anglica</i>   | Lovers Leap, west end of Piercefield Cliffs (cultivated at NBGW)               | T. C. G. Rich                                    | 3.028                       | 4x = tetraploid |

|       |                       |                                                                 |                                                                |       |                 |
|-------|-----------------------|-----------------------------------------------------------------|----------------------------------------------------------------|-------|-----------------|
| FC307 | <i>Sorbus anglica</i> | West Craggs, Craig Breidden,<br>Montgomery (cultivated at NBGW) | T. C. G. Rich                                                  | 2.992 | 4x = tetraploid |
| FC331 | <i>Sorbus anglica</i> | Woody Bay                                                       | T. Rich                                                        | 3.032 | 4x = tetraploid |
| FC366 | <i>Sorbus anglica</i> | Lover's Leap, Piercefield                                       | T. Rich & L. Houston                                           | 2.978 | 4x = tetraploid |
| L144  | <i>Sorbus anglica</i> | Cheddar Gorge, N (NT) side                                      | L. Houston                                                     | 3.002 | 4x = tetraploid |
| L145  | <i>Sorbus anglica</i> | Cheddar Gorge, N (NT) side                                      | L. Houston                                                     | 3.088 | 4x = tetraploid |
| FC004 | <i>Sorbus aria</i>    | The Gully, Clifton                                              | T. C. G. Rich, L. Houston, S.<br>Ludwig, I. Trotman            | 1.495 | 2x = diploid    |
| FC005 | <i>Sorbus aria</i>    | The Gully, Clifton                                              | T. C. G. Rich, L. Houston, S.<br>Ludwig, I. Trotman            | 1.483 | 2x = diploid    |
| FC006 | <i>Sorbus aria</i>    | The Gully, Clifton                                              | T. C. G. Rich, L. Houston, S.<br>Ludwig, I. Trotman            | 1.496 | 2x = diploid    |
| FC010 | <i>Sorbus aria</i>    | The Gully, Clifton                                              | T. C. G. Rich, L. Houston, S.<br>Ludwig, I. Trotman            | 1.494 | 2x = diploid    |
| FC011 | <i>Sorbus aria</i>    | The Gully, Clifton                                              | Ludwig, I. Trotman                                             | 1.479 | 2x = diploid    |
| FC014 | <i>Sorbus aria</i>    | Stokeleigh Camp, southern<br>ramparts                           | T. C. G. Rich, L. Houston, S.<br>Ludwig, I. Trotman            | 1.496 | 2x = diploid    |
| FC017 | <i>Sorbus aria</i>    | Stokeleigh Camp, southern<br>ramparts                           | T. C. G. Rich, L. Houston, S.<br>Ludwig, I. Trotman            | 1.508 | 2x = diploid    |
| FC018 | <i>Sorbus aria</i>    | Leigh Woods, Quarry 4                                           | T. C. G. Rich, L. Houston, S.<br>Ludwig, I. Trotman            | 1.481 | 2x = diploid    |
| FC019 | <i>Sorbus aria</i>    | Leigh Woods, S side parish wall                                 | Ludwig, I. Trotman                                             | 1.479 | 2x = diploid    |
| FC020 | <i>Sorbus aria</i>    | Stokeleigh Camp, southern<br>ramparts                           | T. C. G. Rich, L. Houston, S.<br>Ludwig, I. Trotman            | 1.489 | 2x = diploid    |
| FC022 | <i>Sorbus aria</i>    | Stokeleigh Camp, southern<br>ramparts                           | T. C. G. Rich, L. Houston, S.<br>Ludwig, I. Trotman            | 1.502 | 2x = diploid    |
| FC024 | <i>Sorbus aria</i>    | Leigh Woods, S side parish wall                                 | T. C. G. Rich, L. Houston, S.<br>Ludwig, I. Trotman            | 1.487 | 2x = diploid    |
| FC038 | <i>Sorbus aria</i>    | Redcliff Bay, Portishead                                        | L. Houston, M. Fay, J. P.<br>Moscardo, S. Clermont, T.<br>Rich | 1.445 | 2x = diploid    |
| FC039 | <i>Sorbus aria</i>    | Redcliff Bay, Portishead                                        | L. Houston, M. Fay, J. P.<br>Moscardo, S. Clermont, T.<br>Rich | 1.444 | 2x = diploid    |
| FC055 | <i>Sorbus aria</i>    | Worlebury Hill, west end                                        | L. Houston, M. Fay, J. P.<br>Moscardo, S. Clermont, T.         | 1.483 | 2x = diploid    |

|       |             |                          |                                                        |       |              |
|-------|-------------|--------------------------|--------------------------------------------------------|-------|--------------|
|       |             |                          | Rich                                                   |       |              |
|       |             |                          | L. Houston, M. Fay, J. P.<br>Moscardo, S. Clermont, T. |       |              |
| FC056 | Sorbus aria | Worlebury Hill, west end | Rich                                                   | 1.500 | 2x = diploid |
|       |             |                          | L. Houston, M. Fay, J. P.<br>Moscardo, S. Clermont, T. |       |              |
| FC057 | Sorbus aria | Worlebury Hill, west end | Rich                                                   | 1.500 | 2x = diploid |
|       |             |                          | L. Houston, M. Fay, J. P.<br>Moscardo, S. Clermont, T. |       |              |
| FC058 | Sorbus aria | Worlebury Hill, west end | Rich                                                   | 1.515 | 2x = diploid |
|       |             |                          | L. Houston, M. Fay, J. P.<br>Moscardo, S. Clermont, T. |       |              |
| FC059 | Sorbus aria | Worlebury Hill, west end | Rich                                                   | 1.507 | 2x = diploid |
|       |             |                          | L. Houston, M. Fay, J. P.<br>Moscardo, S. Clermont, T. |       |              |
| FC060 | Sorbus aria | Worlebury Hill, west end | Rich                                                   | 1.490 | 2x = diploid |
|       |             |                          | L. Houston, M. Fay, J. P.<br>Moscardo, S. Clermont, T. |       |              |
| FC061 | Sorbus aria | Worlebury Hill, west end | Rich                                                   | 1.434 | 2x = diploid |
|       |             |                          | L. Houston, M. Fay, J. P.<br>Moscardo, S. Clermont, T. |       |              |
| FC062 | Sorbus aria | Worlebury Hill, west end | Rich                                                   | 1.493 | 2x = diploid |
|       |             |                          | L. Houston, M. Fay, J. P.<br>Moscardo, S. Clermont, T. |       |              |
| FC063 | Sorbus aria | Worlebury Hill, west end | Rich                                                   | 1.499 | 2x = diploid |
|       |             |                          | L. Houston, M. Fay, J. P.<br>Moscardo, S. Clermont, T. |       |              |
| FC066 | Sorbus aria | East Wood, Portishead    | Rich                                                   | 1.483 | 2x = diploid |
|       |             |                          | L. Houston, M. Fay, J. P.<br>Moscardo, S. Clermont, T. |       |              |
| FC067 | Sorbus aria | East Wood, Portishead    | Rich                                                   | 1.525 | 2x = diploid |
|       |             |                          | L. Houston, M. Fay, J. P.<br>Moscardo, S. Clermont, T. |       |              |
| FC069 | Sorbus aria | East Wood, Portishead    | Rich                                                   | 1.499 | 2x = diploid |
|       |             |                          | L. Houston, M. Fay, J. P.<br>Moscardo, S. Clermont, T. |       |              |
| FC070 | Sorbus aria | East Wood, Portishead    | Rich                                                   | 1.489 | 2x = diploid |
| FC073 | Sorbus aria | East Wood, Portishead    | L. Houston, M. Fay, J. P.                              | 1.487 | 2x = diploid |

|        |             |                                               |                                                          |       |              |
|--------|-------------|-----------------------------------------------|----------------------------------------------------------|-------|--------------|
|        |             |                                               | Moscardo, S. Clermont, T. Rich                           |       |              |
|        |             |                                               | L. Houston, M. Fay, J. P. Moscardo, S. Clermont, T. Rich |       |              |
| FC074  | Sorbus aria | East Wood, Portishead                         | Rich                                                     | 1.488 | 2x = diploid |
| FC081  | Sorbus aria | Seven Sisters, northern outcrop               | M. Fay, J. P. Moscardo, S. Clermont, T. Rich             | 1.478 | 2x = diploid |
| FC082  | Sorbus aria | Seven Sisters, northern outcrop               | M. Fay, J. P. Moscardo, S. Clermont, T. Rich             | 1.503 | 2x = diploid |
| FC085  | Sorbus aria | Seven Sisters, middle outcrop                 | M. Fay, J. P. Moscardo, S. Clermont, T. Rich             | 1.477 | 2x = diploid |
| FC092  | Sorbus aria | Seven Sisters, cliff edge before main outcrop | M. Fay, J. P. Moscardo, S. Clermont, T. Rich             | 1.483 | 2x = diploid |
| FC097  | Sorbus aria | Seven Sisters, cliff edge before main outcrop | M. Fay, J. P. Moscardo, S. Clermont, T. Rich             | 1.481 | 2x = diploid |
| FC098  | Sorbus aria | Seven Sisters, cliff edge before main outcrop | M. Fay, J. P. Moscardo, S. Clermont, T. Rich             | 1.506 | 2x = diploid |
| FC100  | Sorbus aria | Seven Sisters, cliff edge before main outcrop | M. Fay, J. P. Moscardo, S. Clermont, T. Rich             | 1.491 | 2x = diploid |
| FC103  | Sorbus aria | Seven Sisters, main outcrop                   | M. Fay, J. P. Moscardo, S. Clermont, T. Rich             | 1.506 | 2x = diploid |
| FC108  | Sorbus aria | Seven Sisters, main outcrop                   | M. Fay, J. P. Moscardo, S. Clermont, T. Rich             | 1.495 | 2x = diploid |
| FC109  | Sorbus aria | Seven Sisters, east of main outcrop           | M. Fay, J. P. Moscardo, S. Clermont, T. Rich             | 1.487 | 2x = diploid |
| FC110  | Sorbus aria | Seven Sisters, east of main outcrop           | M. Fay, J. P. Moscardo, S. Clermont, T. Rich             | 1.525 | 2x = diploid |
| FC112  | Sorbus aria | Seven Sisters, east of main outcrop           | M. Fay, J. P. Moscardo, S. Clermont, T. Rich             | 1.501 | 2x = diploid |
| FC116  | Sorbus aria | Seven Sisters, east of main outcrop           | M. Fay, J. P. Moscardo, S. Clermont, T. Rich             | 1.493 | 2x = diploid |
| FC119a | Sorbus aria | Seven Sisters, east of main outcrop           | M. Fay, J. P. Moscardo, S. Clermont, T. Rich             | 1.580 | 2x = diploid |
| FC125  | Sorbus aria | Symonds Yat, west side                        | M. Fay, J. P. Moscardo, S. Clermont, T. Rich             | 1.487 | 2x = diploid |
| FC145  | Sorbus aria | Coldwell Rocks, near Ship Rock                | M. Fay, J. P. Moscardo, S. Clermont, T. Rich             | 1.489 | 2x = diploid |
| FC154  | Sorbus aria | Offa's Dyke, Tidenham Chase                   | M. Fay, J. P. Moscardo, S. Clermont, T. Rich             | 1.485 | 2x = diploid |

|        |             |                                                           |                                              |       |              |
|--------|-------------|-----------------------------------------------------------|----------------------------------------------|-------|--------------|
| FC155  | Sorbus aria | Offa's Dyke, Tidenham Chase                               | M. Fay, J. P. Moscardo, S. Clermont, T. Rich | 1.495 | 2x = diploid |
| FC156  | Sorbus aria | Offa's Dyke, Tidenham Chase                               | M. Fay, J. P. Moscardo, S. Clermont, T. Rich | 1.485 | 2x = diploid |
| FC157  | Sorbus aria | Offa's Dyke, Tidenham Chase                               | M. Fay, J. P. Moscardo, S. Clermont, T. Rich | 1.475 | 2x = diploid |
| FC158  | Sorbus aria | Offa's Dyke, Tidenham Chase                               | M. Fay, J. P. Moscardo, S. Clermont, T. Rich | 1.488 | 2x = diploid |
| FC159  | Sorbus aria | Offa's Dyke, Tidenham Chase                               | M. Fay, J. P. Moscardo, S. Clermont, T. Rich | 1.509 | 2x = diploid |
| FC160  | Sorbus aria | Offa's Dyke, Tidenham Chase                               | M. Fay, J. P. Moscardo, S. Clermont, T. Rich | 1.493 | 2x = diploid |
| FC351  | Sorbus aria | Gorrashill Wood                                           | T. Rich                                      | 1.489 | 2x = diploid |
| FC352  | Sorbus aria | Gorrashill Wood                                           | T. Rich                                      | 1.492 | 2x = diploid |
| FC353  | Sorbus aria | Gorrashill Wood                                           | T. Rich                                      | 1.49  | 2x = diploid |
| FC354  | Sorbus aria | Offa's Dyke, Tidenham                                     | T. Rich                                      | 1.477 | 2x = diploid |
| FC356  | Sorbus aria | Plumweir Cliff, Tidenham                                  | T. Rich & L. Houston                         | 1.482 | 2x = diploid |
| FC357  | Sorbus aria | Plumweir Cliff, Tidenham                                  | T. Rich & L. Houston                         | 1.492 | 2x = diploid |
| FC358  | Sorbus aria | Devil's Pulpit, Tidenham                                  | T. Rich & L. Houston                         | 1.483 | 2x = diploid |
| FC362  | Sorbus aria | Woodcroft Quarry                                          | T. Rich & L. Houston                         | 1.473 | 2x = diploid |
| FC365  | Sorbus aria | Lover's Leap, Piercefield                                 | T. Rich & L. Houston                         | 1.488 | 2x = diploid |
| FC382  | Sorbus aria | Austria. Niederösterreich, Hainburg                       | M. Christenhusz                              | 1.479 | 2x = diploid |
| FC383  | Sorbus aria | Austria. Niederösterreich, Hainburg                       | M. Christenhusz                              | 1.454 | 2x = diploid |
| FC6478 | Sorbus aria | Col de la Pierre St Martin, Spain                         | M. J. M. Christenhusz, M. Chase & M. Fay     | 1.509 | 2x = diploid |
| FC6481 | Sorbus aria | Col de la Pierre St Martin, Spain                         | M. J. M. Christenhusz, M. Chase & M. Fay     | 1.503 | 2x = diploid |
| L014   | Sorbus aria | Cheddar, N side (NT reserve)                              | L. Houston                                   | 1.5   | 2x = diploid |
| L021   | Sorbus aria | Fairyland, Clifton                                        | L. Houston                                   | 1.498 | 2x = diploid |
| L060   | Sorbus aria | Cheddar Gorge S side, Gough's Cliffs, above Caves complex | L. Houston                                   | 1.478 | 2x = diploid |
| L100   | Sorbus aria | Cheddar Gorge S side, Gough's Cliffs, Twin Cliffs top     | L. Houston                                   | 1.5   | 2x = diploid |
| L102   | Sorbus aria | Cheddar Gorge S side, Gough's Cliffs W, top tier          | L. Houston                                   | 1.498 | 2x = diploid |

|       |                                |                                              |                                                  |       |               |
|-------|--------------------------------|----------------------------------------------|--------------------------------------------------|-------|---------------|
| L103  | Sorbus aria                    | Cheddar Gorge S side, Gough's Top, W         | L. Houston                                       | 1.489 | 2x = diploid  |
| L105  | Sorbus aria                    | Cheddar Gorge S side, Gough's Top, W         | L. Houston                                       | 1.497 | 2x = diploid  |
| L106  | Sorbus aria                    | Cheddar Gorge S side, E of Shoot Gully       | L. Houston                                       | 1.499 | 2x = diploid  |
| L107  | Sorbus aria                    | Cheddar Gorge S side, E of Shoot Gully       | L. Houston                                       | 1.481 | 2x = diploid  |
| L110  | Sorbus aria                    | Cheddar Gorge S side, E of Shoot Gully       | L. Houston                                       | 1.495 | 2x = diploid  |
| L117  | Sorbus aria                    | Cheddar Gorge, N (NT) side, Heart Leaf Bluff | L. Houston                                       | 1.485 | 2x = diploid  |
| L118  | Sorbus aria                    | Cheddar Gorge, N (NT) side, Heart Leaf Bluff | L. Houston                                       | 1.495 | 2x = diploid  |
| L120  | Sorbus aria                    | Cheddar Gorge, N (NT) side, Commoners' Spur  | L. Houston                                       | 1.489 | 2x = diploid  |
| L130  | Sorbus aria                    | Weston Big Wood: Valley Road                 | L. Houston                                       | 1.501 | 2x = diploid  |
| L132  | Sorbus aria                    | Weston Big Wood: Valley Road                 | L. Houston                                       | 1.468 | 2x = diploid  |
| L134  | Sorbus aria                    | Avon Gorge, vc 6: Leigh Woods plateau        | L. Houston                                       | 1.493 | 2x = diploid  |
| L139  | Sorbus aria                    | Burrington Combe                             | L. Houston                                       | 1.495 | 2x = diploid  |
| L121  | Sorbus aria x eminens          | Cheddar Gorge, N (NT) side, Commoners' Spur  | L. Houston                                       | 2.285 | 3x = triploid |
| FC131 | Sorbus aria x porrigentiformis | Symonds Yat viewpoint by café                | M. Fay, J. P. Moscardo, S. Clermont, T. Rich     | 2.278 | 3x = triploid |
| L125  | Sorbus aria x porrigentiformis | Blaise Estate, Goram's Chair                 | L. Houston                                       | 2.252 | 3x = triploid |
| L126  | Sorbus aria x porrigentiformis | Blaise Estate, Potter's Point                | L. Houston                                       | 2.272 | 3x = triploid |
| L127  | Sorbus aria x porrigentiformis | Blaise Estate, Potter's Point                | L. Houston                                       | 2.239 | 3x = triploid |
| L128  | Sorbus aria x porrigentiformis | Blaise Estate, Potter's Point                | L. Houston                                       | 2.289 | 3x = triploid |
| FC007 | Sorbus aucuparia               | The Plain, Leigh Woods                       | T. C. G. Rich, L. Houston, S. Ludwig, I. Trotman | 1.523 | 2x = diploid  |
| FC137 | Sorbus aucuparia               | Symonds Yat, east side                       | M. Fay, J. P. Moscardo, S. Clermont, T. Rich     | 1.506 | 2x = diploid  |
| FC166 | Sorbus aucuparia               | Craig y Castell                              | T. C. G. Rich                                    | 1.516 | 2x = diploid  |



|        |                                      |                                                                                                      |                                                  |       |                 |
|--------|--------------------------------------|------------------------------------------------------------------------------------------------------|--------------------------------------------------|-------|-----------------|
| FC167  | <i>Sorbus aucuparia</i>              | Craig y Cilau NNR                                                                                    | T. C. G. Rich                                    | 1.528 | 2x = diploid    |
| FC196  | <i>Sorbus aucuparia</i>              | Penmoelallt                                                                                          | T. C. G. Rich                                    | 1.526 | 2x = diploid    |
| FC206  | <i>Sorbus aucuparia</i>              | Penmoelallt                                                                                          | T. C. G. Rich                                    | 1.537 | 2x = diploid    |
| FC211  | <i>Sorbus aucuparia</i>              | Pwll-du Quarry, Govilon                                                                              | T. C. G. Rich                                    | 1.517 | 2x = diploid    |
| FC319  | <i>Sorbus aucuparia</i>              | Neck Wood, Trentishoe                                                                                | T. Rich & S. Whild                               | 1.517 | 2x = diploid    |
| FC369  | <i>Sorbus aucuparia</i>              | Finland. Uusimaa, Vihti. Nuuksio National Park. W of the lake Haukkalampi. N 60 18'23", E 24 30'12". | M. Christenhusz                                  | 1.501 | 2x = diploid    |
| FC370  | <i>Sorbus aucuparia</i>              | Finland. Uusimaa, Vihti. Nuuksio National Park. W of the lake Haukkalampi. N 60 18'23", E 24 30'12". | M. Christenhusz                                  | 1.528 | 2x = diploid    |
| FC6479 | <i>Sorbus aucuparia</i>              | Col de la Pierre St Martin, Spain                                                                    | M. J. M. Christenhusz, M. Chase & M. Fay         | 1.538 | 2x = diploid    |
| FC6480 | <i>Sorbus aucuparia</i>              | Col de la Pierre St Martin, Spain                                                                    | M. J. M. Christenhusz, M. Chase & M. Fay         | 1.534 | 2x = diploid    |
| FC6494 | <i>Sorbus aucuparia</i>              | Pyrenees Atlantiques, Lac d'Artouste near Gabas, France                                              | M. J. M. Christenhusz, M. Chase & M. Fay         | 1.525 | 2x = diploid    |
| FC371  | <i>Sorbus aucuparia carelica</i>     | Finland. Nastola.                                                                                    | M. Christenhusz                                  | 1.529 | 2x = diploid    |
| FC372  | <i>Sorbus aucuparia heteromorpha</i> | Finland. Åland (Ahvenanmaa), Lemland, Nåtö Island Biological Station.                                | M. Christenhusz                                  | 1.563 | 2x = diploid    |
| FC373  | <i>Sorbus aucuparia x hybrida</i>    | unknown, historic tree in garden                                                                     | M. Christenhusz                                  | 1.565 | 2x = diploid    |
| FC009  | <i>Sorbus bristoliensis</i>          | The Gully, Clifton                                                                                   | T. C. G. Rich, L. Houston, S. Ludwig, I. Trotman | 2.318 | 3x = triploid   |
| FC161  | <i>Sorbus cambrensis</i>             | Coed Pantydarren                                                                                     | T. C. G. Rich                                    | 3.722 | 5x = pentaploid |
| FC162  | <i>Sorbus cambrensis</i>             | Coed Pantydarren                                                                                     | T. C. G. Rich                                    | 3.768 | 5x = pentaploid |
| FC163  | <i>Sorbus cambrensis</i>             | Coed Pantydarren                                                                                     | T. C. G. Rich                                    | 3.689 | 5x = pentaploid |
| FC175  | <i>Sorbus cambrensis</i>             | Craig y Cilau NNR                                                                                    | T. C. G. Rich                                    | 3.794 | 5x = pentaploid |
| FC178  | <i>Sorbus cambrensis</i>             | Craig y Cilau NNR                                                                                    | T. C. G. Rich                                    | 3.769 | 5x = pentaploid |
| FC179  | <i>Sorbus cambrensis</i>             | Craig y Cilau NNR                                                                                    | T. C. G. Rich                                    | 3.833 | 5x = pentaploid |
| FC186  | <i>Sorbus cambrensis</i>             | Craig y Cilau NNR                                                                                    | T. C. G. Rich                                    | 3.724 | 5x = pentaploid |

|       |                                                                  |                                                                                     |               |       |                 |
|-------|------------------------------------------------------------------|-------------------------------------------------------------------------------------|---------------|-------|-----------------|
| FC189 | <i>Sorbus cambrensis</i>                                         | Craig y Cilau NNR                                                                   | T. C. G. Rich | 3.782 | 5x = pentaploid |
| FC193 | <i>Sorbus cambrensis</i>                                         | Craig y Cilau NNR                                                                   | T. C. G. Rich | 3.734 | 5x = pentaploid |
| FC217 | <i>Sorbus cambrensis</i>                                         | Cwm Clydach NNR                                                                     | T. C. G. Rich | 3.647 | 5x = pentaploid |
| FC218 | <i>Sorbus cambrensis</i>                                         | Cwm Clydach NNR                                                                     | T. C. G. Rich | 3.711 | 5x = pentaploid |
| FC219 | <i>Sorbus cambrensis</i>                                         | Cwm Clydach NNR                                                                     | T. C. G. Rich | 3.69  | 5x = pentaploid |
| FC221 | <i>Sorbus cambrensis</i>                                         | Cwm Clydach NNR                                                                     | T. C. G. Rich | 3.715 | 5x = pentaploid |
| L048  | <i>Sorbus cf. anglica x aria</i>                                 | Cheddar Gorge S side, Gough's Cliffs, Rock-sport spur                               | L. Houston    | 2.276 | 3x = triploid   |
| L047  | <i>Sorbus cf. aria</i><br>introgressed with<br><i>torminalis</i> | Cheddar Gorge S side, Gough's Cliffs, Rock-sport spur<br>Craig y Cilau, Llangattock | L. Houston    | 2.254 | 3x = triploid   |
| FC300 | <i>Sorbus cf. cambrensis</i>                                     | (cultivated at NBGW)                                                                | T. C. G. Rich | 2.249 | 3x = triploid   |
| L016  | <i>Sorbus cf. cheddarensis</i>                                   | Draycott Housegrounds Reserve                                                       | L. Houston    | 2.263 | 3x = triploid   |
| L017  | <i>Sorbus cf. cheddarensis</i>                                   | Cheddar, N side (NT reserve),<br>Horseshoe Bend                                     | L. Houston    | 2.228 | 3x = triploid   |
| L049  | <i>Sorbus cf. cheddarensis</i>                                   | Cheddar Gorge S side, Gough's Cliffs, N of Caves offices                            | L. Houston    | 2.246 | 3x = triploid   |
| L052  | <i>Sorbus cf. cheddarensis</i>                                   | Cheddar Gorge S side, Gough's Cliffs, high open spur                                | L. Houston    | 2.309 | 3x = triploid   |
| L055  | <i>Sorbus cf. cheddarensis</i>                                   | Cheddar Gorge S side, Gough's Cliffs, back of high spur                             | L. Houston    | 2.286 | 3x = triploid   |
| L071  | <i>Sorbus cf. cheddarensis</i>                                   | Cheddar Gorge S side, Gough's Cliffs, E                                             | L. Houston    | 2.277 | 3x = triploid   |
| L079  | <i>Sorbus cf. cheddarensis</i>                                   | Cheddar Gorge S side, E of Jacob's Ladder                                           | L. Houston    | 2.278 | 3x = triploid   |
| L104  | <i>Sorbus cf. cheddarensis</i>                                   | Cheddar Gorge S side, Gough's Top, W                                                | L. Houston    | 2.278 | 3x = triploid   |
| L108  | <i>Sorbus cf. cheddarensis</i>                                   | Cheddar Gorge S side, E of Shoot Gully                                              | L. Houston    | 2.243 | 3x = triploid   |
| L109  | <i>Sorbus cf. cheddarensis</i>                                   | Cheddar Gorge S side, E of Shoot Gully                                              | L. Houston    | 2.248 | 3x = triploid   |
| L112  | <i>Sorbus cf. cheddarensis</i>                                   | Cheddar Gorge, N (NT) side, Heart Leaf Bluff                                        | L. Houston    | 2.241 | 3x = triploid   |
| L113  | <i>Sorbus cf. cheddarensis</i>                                   | Cheddar Gorge, N (NT) side,<br>Commoners' Spur                                      | L. Houston    | 2.27  | 3x = triploid   |

|       |                                    |                                                               |                                                                        |       |                 |
|-------|------------------------------------|---------------------------------------------------------------|------------------------------------------------------------------------|-------|-----------------|
| L114  | Sorbus cf. cheddarensis            | Cheddar Gorge, N (NT) side, Commoners' Spur                   | L. Houston                                                             | 2.3   | 3x = triploid   |
| L119  | Sorbus cf. cheddarensis            | Cheddar Gorge, N (NT) side, Commoners' Spur                   | L. Houston                                                             | 2.265 | 3x = triploid   |
| L122  | Sorbus cf. cheddarensis            | Cheddar Gorge, N (NT) side, Commoners' Spur                   | L. Houston<br>L. Houston, M. Fay, J. P. Moscardo, S. Clermont, T. Rich | 2.253 | 3x = triploid   |
| FC028 | Sorbus cf. eminens                 | Kilkenny Bay, Portishead                                      | Rich                                                                   | 3.019 | 4x = tetraploid |
| L066  | Sorbus cf. eminens                 | Cheddar Gorge S side, coach park slopes                       | L. Houston                                                             | 3.019 | 4x = tetraploid |
| L068  | Sorbus cf. eminens                 | Cheddar Gorge S side, coach park slopes                       | L. Houston                                                             | 3.047 | 4x = tetraploid |
| L058  | Sorbus cf. eminentoides            | Cheddar Gorge S side, Gough's Cliffs, twin cliffs gully       | L. Houston                                                             | 3.043 | 4x = tetraploid |
| L064  | Sorbus cf. eminentoides            | Cheddar Gorge S side, Gough's Cliffs, twin cliffs gully       | L. Houston                                                             | 3.012 | 4x = tetraploid |
| L098  | Sorbus cf. eminentoides            | Cheddar Gorge S side, Gough's Cliffs, Twin Cliffs gully (top) | L. Houston                                                             | 2.987 | 4x = tetraploid |
| L099  | Sorbus cf. eminentoides            | Cheddar Gorge S side, Gough's Cliffs, Twin Cliffs gully (top) | L. Houston                                                             | 3.029 | 4x = tetraploid |
| L101  | Sorbus cf. eminentoides            | Cheddar Gorge S side, Gough's Cliffs, Twin Cliffs top         | L. Houston                                                             | 3.014 | 4x = tetraploid |
| L035  | Sorbus cf. leighensis              | Avon Gorge, above Portway                                     | L. Houston                                                             | 2.296 | 3x = triploid   |
| L036  | Sorbus cf. leighensis              | Avon Gorge, Great Quarry, Clifton                             | L. Houston                                                             | 2.297 | 3x = triploid   |
| L028  | Sorbus cf. Observatory Hill taxon  | Observatory Hill, Clifton                                     | L. Houston                                                             | 2.256 | 3x = triploid   |
| L029  | Sorbus cf. Observatory Hill taxon  | Observatory Hill, Clifton                                     | L. Houston                                                             | 2.248 | 3x = triploid   |
| L030  | Sorbus cf. Observatory Hill taxon  | Observatory Hill, Clifton                                     | L. Houston                                                             | 2.281 | 3x = triploid   |
| L032  | Sorbus cf. Observatory Hill taxon  | Observatory Hill, Clifton                                     | L. Houston                                                             | 2.24  | 3x = triploid   |
| L033  | Sorbus cf. Observatory Hill taxon  | Observatory Hill, Clifton                                     | L. Houston<br>L. Houston, M. Fay, J. P. Moscardo, S. Clermont, T. Rich | 2.264 | 3x = triploid   |
| FC071 | Sorbus cf. Portishead taxon x aria | East Wood, Portishead                                         | Rich                                                                   | 2.230 | 3x = triploid   |

|       |                               |                                                                    |                 |       |                 |
|-------|-------------------------------|--------------------------------------------------------------------|-----------------|-------|-----------------|
| FC304 | <i>Sorbus cf. stirtoniana</i> | West Craggs, Craig Breidden,<br>Montgomery (cultivated at<br>NBGW) | T. C. G. Rich   | 1.489 | 2x = diploid    |
| FC305 | <i>Sorbus cf. stirtoniana</i> | West Craggs, Craig Breidden,<br>Montgomery (cultivated at<br>NBGW) | T. C. G. Rich   | 1.498 | 2x = diploid    |
| L001  | <i>Sorbus cf. x avonensis</i> | Leigh Woods, Stokeleigh Cliffs                                     | L. Houston      | 2.259 | 3x = triploid   |
| L002  | <i>Sorbus cf. x avonensis</i> | Leigh Woods, Stokeleigh Cliffs                                     | L. Houston      | 2.248 | 3x = triploid   |
| L003  | <i>Sorbus cf. x avonensis</i> | Leigh Woods, Stokeleigh Cliffs                                     | L. Houston      | 2.242 | 3x = triploid   |
| L004  | <i>Sorbus cf. x avonensis</i> | Leigh Woods, Stokeleigh Cliffs                                     | L. Houston      | 2.24  | 3x = triploid   |
| L005  | <i>Sorbus cf. x avonensis</i> | Leigh Woods, Stokeleigh Cliffs                                     | L. Houston      | 2.248 | 3x = triploid   |
| L006  | <i>Sorbus cf. x avonensis</i> | Leigh Woods, Stokeleigh Cliffs                                     | L. Houston      | 2.242 | 3x = triploid   |
| L007  | <i>Sorbus cf. x avonensis</i> | Leigh Woods, Stokeleigh Cliffs                                     | L. Houston      | 2.235 | 3x = triploid   |
| L008  | <i>Sorbus cf. x avonensis</i> | Leigh Woods, Stokeleigh Cliffs                                     | L. Houston      | 2.248 | 3x = triploid   |
| L009  | <i>Sorbus cf. x avonensis</i> | Leigh Woods, Stokeleigh Cliffs                                     | L. Houston      | 2.262 | 3x = triploid   |
| L010  | <i>Sorbus cf. x avonensis</i> | Leigh Woods, Stokeleigh Cliffs                                     | L. Houston      | 2.264 | 3x = triploid   |
| L011  | <i>Sorbus cf. x avonensis</i> | Leigh Woods, Stokeleigh Cliffs                                     | L. Houston      | 2.257 | 3x = triploid   |
| L013  | <i>Sorbus cf. x avonensis</i> | Leigh Woods, Rockfall Cliff                                        | L. Houston      | 2.285 | 3x = triploid   |
| L043  | <i>Sorbus cf. x avonensis</i> | Quarry 4, Leigh Woods                                              | L. Houston      | 2.288 | 3x = triploid   |
| FC384 | <i>Sorbus chamaemespilus</i>  | Switzerland. Valais 1700 m                                         | M. Christenhusz | 3.105 | 4x = tetraploid |
| FC385 | <i>Sorbus chamaemespilus</i>  | Slovenia. Pod Spikom c. 1400 m,<br>south of Karanjska Gora.        | M. Christenhusz | 1.596 | 2x = diploid    |
| L018  | <i>Sorbus cheddarensis</i>    | Cheddar, N side (NT reserve),<br>Horseshoe Bend                    | L. Houston      | 2.245 | 3x = triploid   |
| L019  | <i>Sorbus cheddarensis</i>    | Cheddar, N side (NT reserve),<br>Overshoot Wall area               | L. Houston      | 2.279 | 3x = triploid   |
| L020  | <i>Sorbus cheddarensis</i>    | Cheddar, N side (NT reserve),<br>Overshoot Wall area               | L. Houston      | 2.272 | 3x = triploid   |
| L022  | <i>Sorbus cheddarensis</i>    | Cheddar, N side (NT reserve),<br>Horseshoe Bend                    | L. Houston      | 2.281 | 3x = triploid   |
| L111  | <i>Sorbus cheddarensis</i>    | Cheddar Gorge S side, E of Shoot<br>Gully                          | L. Houston      | 2.243 | 3x = triploid   |
| FC387 | <i>Sorbus commixta</i>        | Japan. Hokkaido, Rumoi District.<br>Teshio Experimental Forest of  | M. Christenhusz | 1.517 | 2x = diploid    |

| Hokkaido University. |                           |                                                                                                   |                                                                |       |                 |
|----------------------|---------------------------|---------------------------------------------------------------------------------------------------|----------------------------------------------------------------|-------|-----------------|
| FC309                | <i>Sorbus cuneifolia</i>  | Eglwyseg mountain, Tom Knight<br>(cultivated at NBGW)                                             | T. C. G. Rich                                                  | 2.963 | 4x = tetraploid |
| FC389                | <i>Sorbus decora</i>      | Canada. Ontario, Algoma District,<br>Batchawana Bay, shore of Lake<br>Superior. 46°55'N, 84°40'W. | M. Christenhusz                                                | 3.006 | 4x = tetraploid |
| FC311                | <i>Sorbus devoniensis</i> | South Molton roadside                                                                             | T. Rich & S. Whild                                             | 3.126 | 4x = tetraploid |
| FC312                | <i>Sorbus devoniensis</i> | Neck Wood, Trentishoe                                                                             | T. Rich & S. Whild                                             | 3.185 | 4x = tetraploid |
| FC314                | <i>Sorbus devoniensis</i> | Neck Wood, Trentishoe                                                                             | T. Rich & S. Whild                                             | 3.15  | 4x = tetraploid |
| FC325                | <i>Sorbus devoniensis</i> | Woody Bay                                                                                         | T. Rich & S. Whild                                             | 3.108 | 4x = tetraploid |
| FC326                | <i>Sorbus devoniensis</i> | Woody Bay                                                                                         | T. Rich & S. Whild                                             | 3.145 | 4x = tetraploid |
| FC330                | <i>Sorbus devoniensis</i> | Woody Bay                                                                                         | T. Rich                                                        | 3.196 | 4x = tetraploid |
| FC015                | <i>Sorbus eminens</i>     | Leigh Woods                                                                                       | T. C. G. Rich, L. Houston, S.<br>Ludwig, I. Trotman            | 3.027 | 4x = tetraploid |
| FC016                | <i>Sorbus eminens</i>     | Leigh Woods                                                                                       | T. C. G. Rich, L. Houston, S.<br>Ludwig, I. Trotman            | 3.03  | 4x = tetraploid |
| FC021                | <i>Sorbus eminens</i>     | Towpath, Leigh Woods                                                                              | T. C. G. Rich, L. Houston, S.<br>Ludwig, I. Trotman            | 3.025 | 4x = tetraploid |
| FC023                | <i>Sorbus eminens</i>     | Leigh Woods                                                                                       | T. C. G. Rich, L. Houston, S.<br>Ludwig, I. Trotman            | 3.055 | 4x = tetraploid |
| FC046                | <i>Sorbus eminens</i>     | Helen's Steps, Worle                                                                              | L. Houston, M. Fay, J. P.<br>Moscardo, S. Clermont, T.<br>Rich | 3.054 | 4x = tetraploid |
| FC047                | <i>Sorbus eminens</i>     | Helen's Steps, Worle                                                                              | L. Houston, M. Fay, J. P.<br>Moscardo, S. Clermont, T.<br>Rich | 3.026 | 4x = tetraploid |
| FC048                | <i>Sorbus eminens</i>     | Helen's Steps, Worle                                                                              | L. Houston, M. Fay, J. P.<br>Moscardo, S. Clermont, T.<br>Rich | 3.032 | 4x = tetraploid |
| FC049                | <i>Sorbus eminens</i>     | Helen's Steps, Worle                                                                              | L. Houston, M. Fay, J. P.<br>Moscardo, S. Clermont, T.<br>Rich | 3.033 | 4x = tetraploid |
| FC050                | <i>Sorbus eminens</i>     | Helen's Steps, Worle                                                                              | L. Houston, M. Fay, J. P.<br>Moscardo, S. Clermont, T.<br>Rich | 3.011 | 4x = tetraploid |
| FC051                | <i>Sorbus eminens</i>     | Toll Road, Weston-super-mare                                                                      | L. Houston, M. Fay, J. P.<br>Moscardo, S. Clermont, T.         | 3.037 | 4x = tetraploid |

|       |                |                                                               |                                                          |       |                 |
|-------|----------------|---------------------------------------------------------------|----------------------------------------------------------|-------|-----------------|
|       |                |                                                               | Rich                                                     |       |                 |
|       |                |                                                               | L. Houston, M. Fay, J. P. Moscardo, S. Clermont, T. Rich |       |                 |
| FC052 | Sorbus eminens | Toll Road, Weston-super-mare                                  | Rich                                                     | 3.037 | 4x = tetraploid |
|       |                |                                                               | L. Houston, M. Fay, J. P. Moscardo, S. Clermont, T. Rich |       |                 |
| FC053 | Sorbus eminens | Toll Road, Weston-super-mare                                  | Rich                                                     | 3.036 | 4x = tetraploid |
|       |                |                                                               | L. Houston, M. Fay, J. P. Moscardo, S. Clermont, T. Rich |       |                 |
| FC054 | Sorbus eminens | Worlebury Hill, west end                                      | Rich                                                     | 3.009 | 4x = tetraploid |
|       |                |                                                               | L. Houston, M. Fay, J. P. Moscardo, S. Clermont, T. Rich |       |                 |
| FC072 | Sorbus eminens | East Wood, Portishead                                         | Rich                                                     | 3.024 | 4x = tetraploid |
|       |                | Cheddar Gorge S side, Gough's Cliffs, high open spur          | L. Houston                                               | 3.043 | 4x = tetraploid |
| L051  | Sorbus eminens | Cheddar Gorge S side, Gough's Cliffs, back of high spur       | L. Houston                                               | 3.027 | 4x = tetraploid |
| L054  | Sorbus eminens | Cheddar Gorge S side, Gough's Cliffs, mid cliffs slopes       | L. Houston                                               | 3.046 | 4x = tetraploid |
| L057  | Sorbus eminens | Cheddar Gorge S side, Gough's Cliffs, below twin cliffs       | L. Houston                                               | 3.011 | 4x = tetraploid |
| L063  | Sorbus eminens | Cheddar Gorge S side, coach park slopes                       | L. Houston                                               | 3.044 | 4x = tetraploid |
| L065  | Sorbus eminens | Cheddar Gorge S side, Gough's Cliffs, E                       | L. Houston                                               | 3.066 | 4x = tetraploid |
| L073  | Sorbus eminens | Cheddar Gorge S side, E of Jacob's Ladder                     | L. Houston                                               | 2.98  | 4x = tetraploid |
| L078  | Sorbus eminens | Cheddar Gorge S side, Gough's Cliffs W, 1st upper tier        | L. Houston                                               | 3.018 | 4x = tetraploid |
| L092  | Sorbus eminens | Cheddar Gorge S side, Gough's Cliffs W, 1st upper tier        | L. Houston                                               | 3.036 | 4x = tetraploid |
| L096  | Sorbus eminens | Cheddar Gorge S side, Gough's Cliffs, Twin Cliffs gully (top) | L. Houston                                               | 3.028 | 4x = tetraploid |
| L097  | Sorbus eminens | Cheddar Gorge S side, E of Shoot Gully                        | L. Houston                                               | 3.025 | 4x = tetraploid |
| L105  | Sorbus eminens | Weston Big Wood: Valley Road                                  | L. Houston                                               | 3.013 | 4x = tetraploid |
| L129  | Sorbus eminens |                                                               | I.C. Trueman & M.W.                                      |       |                 |
| SP1   | Sorbus eminens | Sutton Park, vc 38 Warwickshire                               | Poulton                                                  | 2.992 | 4x = tetraploid |

|       |                              |                                                            |                                                 |       |                 |
|-------|------------------------------|------------------------------------------------------------|-------------------------------------------------|-------|-----------------|
| SP2   | <i>Sorbus eminens</i>        | Sutton Park, vc 38 Warwickshire                            | I.C. Trueman & M.W.<br>Poulton                  | 3.022 | 4x = tetraploid |
| SP3   | <i>Sorbus eminens</i>        | Sutton Park, vc 38 Warwickshire                            | I.C. Trueman & M.W.<br>Poulton                  | 3.026 | 4x = tetraploid |
| SP4   | <i>Sorbus eminens</i>        | Sutton Park, vc 38 Warwickshire                            | I.C. Trueman & M.W.<br>Poulton                  | 3.021 | 4x = tetraploid |
| SP5   | <i>Sorbus eminens</i>        | Sutton Park, vc 38 Warwickshire                            | I.C. Trueman & M.W.<br>Poulton                  | 3.038 | 4x = tetraploid |
| SP6   | <i>Sorbus eminens</i>        | Sutton Park, vc 38 Warwickshire                            | I.C. Trueman & M.W.<br>Poulton                  | 3.064 | 4x = tetraploid |
| FC084 | <i>Sorbus eminentiformis</i> | Seven Sisters, middle outcrop                              | M. Fay, J. P. Moscardo, S.<br>Clermont, T. Rich | 2.998 | 4x = tetraploid |
| FC086 | <i>Sorbus eminentiformis</i> | Seven Sisters, behind middle<br>outcrop                    | M. Fay, J. P. Moscardo, S.<br>Clermont, T. Rich | 3.005 | 4x = tetraploid |
| FC093 | <i>Sorbus eminentiformis</i> | Seven Sisters, cliff edge before<br>main outcrop           | M. Fay, J. P. Moscardo, S.<br>Clermont, T. Rich | 3.034 | 4x = tetraploid |
| FC107 | <i>Sorbus eminentiformis</i> | Seven Sisters, main outcrop                                | M. Fay, J. P. Moscardo, S.<br>Clermont, T. Rich | 3.023 | 4x = tetraploid |
| FC123 | <i>Sorbus eminentiformis</i> | Symonds Yat, west side                                     | M. Fay, J. P. Moscardo, S.<br>Clermont, T. Rich | 2.988 | 4x = tetraploid |
| FC128 | <i>Sorbus eminentiformis</i> | Symonds Yat, west side                                     | M. Fay, J. P. Moscardo, S.<br>Clermont, T. Rich | 2.971 | 4x = tetraploid |
| FC133 | <i>Sorbus eminentiformis</i> | Symonds Yat cleared viewpoint<br>north of café             | M. Fay, J. P. Moscardo, S.<br>Clermont, T. Rich | 2.970 | 4x = tetraploid |
| FC138 | <i>Sorbus eminentiformis</i> | Coldwell Rocks, rock west of Ship<br>Rock                  | M. Fay, J. P. Moscardo, S.<br>Clermont, T. Rich | 3.033 | 4x = tetraploid |
| FC142 | <i>Sorbus eminentiformis</i> | Coldwell Rocks, near Ship Rock                             | M. Fay, J. P. Moscardo, S.<br>Clermont, T. Rich | 3.008 | 4x = tetraploid |
| FC146 | <i>Sorbus eminentiformis</i> | Coldwell Rocks, near Ship Rock                             | M. Fay, J. P. Moscardo, S.<br>Clermont, T. Rich | 3.055 | 4x = tetraploid |
| L056  | <i>Sorbus eminentoides</i>   | Cheddar Gorge S side, Gough's<br>Cliffs, mid cliffs slopes | L. Houston                                      | 2.975 | 4x = tetraploid |
| L062  | <i>Sorbus eminentoides</i>   | Cheddar Gorge S side, Gough's<br>Cliffs, below twin cliffs | L. Houston                                      | 3.009 | 4x = tetraploid |
| L070  | <i>Sorbus eminentoides</i>   | Cheddar Gorge S side, Gough's<br>Cliffs, E                 | L. Houston                                      | 3.05  | 4x = tetraploid |
| L076  | <i>Sorbus eminentoides</i>   | Cheddar Gorge S side, Gough's<br>Top, W                    | L. Houston                                      | 3.002 | 4x = tetraploid |

|       |                              |                                                                                                                                       |                                                  |        |                 |
|-------|------------------------------|---------------------------------------------------------------------------------------------------------------------------------------|--------------------------------------------------|--------|-----------------|
| L095  | <i>Sorbus eminentoides</i>   | Cheddar Gorge S side, Gough's Cliffs W, 1st upper tier<br>Finland. Åland (Ahvenanmaa), Lemland, Nåtö Island Biological Station.       | L. Houston                                       | 2.977  | 4x = tetraploid |
| FC375 | <i>Sorbus hybrida</i>        | Finland. Åland (Ahvenanmaa), Lemland, Nåtö, just N from Mattson's (Gärsins Backe)                                                     | M. Christenhusz                                  | 2.908  | 4x = tetraploid |
| FC376 | <i>Sorbus hybrida</i>        |                                                                                                                                       | M. Christenhusz<br>T. C. G. Rich, L. Houston, S. | 2.984  | 4x = tetraploid |
| FC012 | <i>Sorbus intermedia</i>     | Towpath, Leigh Woods                                                                                                                  | Ludwig, I. Trotman                               | 3.07   | 4x = tetraploid |
| FC377 | <i>Sorbus intermedia</i>     | unknown, historic tree in garden                                                                                                      | M. Christenhusz                                  | 3.039  | 4x = tetraploid |
| FC378 | <i>Sorbus intermedia</i>     | unknown, historic tree in garden                                                                                                      | M. Christenhusz                                  | 3.021  | 4x = tetraploid |
| FC379 | <i>Sorbus intermedia</i>     | Norway. Akershus, Asker, Hvalstrand.<br>West end of Arnside Knott, Lancashire (cultivated at NBGW; origin ADP4, Ness Botanic Gardens) | M. Christenhusz                                  | 2.943  | 4x = tetraploid |
| FC308 | <i>Sorbus lancastriensis</i> |                                                                                                                                       | T. C. G. Rich                                    | 2.995  | 4x = tetraploid |
| L080  | <i>Sorbus lancastriensis</i> | Silverdale Cove                                                                                                                       | L. Houston                                       | 2.97   | 4x = tetraploid |
| L081  | <i>Sorbus lancastriensis</i> | Silverdale Cove                                                                                                                       | L. Houston                                       | 3.03   | 4x = tetraploid |
| L082  | <i>Sorbus lancastriensis</i> | Scout Scar                                                                                                                            | L. Houston                                       | 2.979  | 4x = tetraploid |
| L083  | <i>Sorbus lancastriensis</i> | Scout Scar                                                                                                                            | L. Houston                                       | 2.981  | 4x = tetraploid |
| L084  | <i>Sorbus lancastriensis</i> | Scout Scar                                                                                                                            | L. Houston                                       | 2.984  | 4x = tetraploid |
| L085  | <i>Sorbus lancastriensis</i> | Humphrey Head                                                                                                                         | L. Houston                                       | 2.992  | 4x = tetraploid |
| L086  | <i>Sorbus lancastriensis</i> | Humphrey Head                                                                                                                         | L. Houston                                       | 3.03   | 4x = tetraploid |
| L087  | <i>Sorbus lancastriensis</i> | Humphrey Head                                                                                                                         | L. Houston                                       | 3.062  | 4x = tetraploid |
| L088  | <i>Sorbus lancastriensis</i> | Humphrey Head                                                                                                                         | L. Houston<br>T. C. G. Rich, L. Houston, S.      | 2.9801 | 4x = tetraploid |
| FC013 | <i>Sorbus latifolia</i>      | Stokeleigh Camp                                                                                                                       | Ludwig, I. Trotman                               | 3.143  | 4x = tetraploid |
| FC177 | <i>Sorbus leptophylla</i>    | Craig y Cilau NNR                                                                                                                     | T. C. G. Rich                                    | 3.030  | 4x = tetraploid |
| FC181 | <i>Sorbus leptophylla</i>    | Craig y Cilau NNR                                                                                                                     | T. C. G. Rich                                    | 2.991  | 4x = tetraploid |
| FC182 | <i>Sorbus leptophylla</i>    | Craig y Cilau NNR                                                                                                                     | T. C. G. Rich                                    | 3.008  | 4x = tetraploid |
| FC184 | <i>Sorbus leptophylla</i>    | Craig y Cilau NNR                                                                                                                     | T. C. G. Rich                                    | 2.937  | 4x = tetraploid |
| FC187 | <i>Sorbus leptophylla</i>    | Craig y Cilau NNR                                                                                                                     | T. C. G. Rich                                    | 3.070  | 4x = tetraploid |



|        |                          |                                                                                                                                  |                                                     |       |                 |
|--------|--------------------------|----------------------------------------------------------------------------------------------------------------------------------|-----------------------------------------------------|-------|-----------------|
| FC195  | <i>Sorbus leyana</i>     | Penmoelallt                                                                                                                      | T. C. G. Rich                                       | 2.280 | 3x = triploid   |
| FC198  | <i>Sorbus leyana</i>     | Penmoelallt                                                                                                                      | T. C. G. Rich                                       | 2.267 | 3x = triploid   |
| FC202  | <i>Sorbus leyana</i>     | Penmoelallt                                                                                                                      | T. C. G. Rich                                       | 2.247 | 3x = triploid   |
| FC204  | <i>Sorbus leyana</i>     | Penmoelallt                                                                                                                      | T. C. G. Rich                                       | 2.265 | 3x = triploid   |
| FC313  | <i>Sorbus margaretae</i> | Neck Wood, Trentishoe                                                                                                            | T. Rich & S. Whild                                  | 3.026 | 4x = tetraploid |
| FC322  | <i>Sorbus margaretae</i> | Neck Wood, Trentishoe                                                                                                            | T. Rich & S. Whild                                  | 2.995 | 4x = tetraploid |
| FC333  | <i>Sorbus margaretae</i> | Woody Bay                                                                                                                        | T. Rich                                             | 3.084 | 4x = tetraploid |
| FC345  | <i>Sorbus margaretae</i> | Glenthorne                                                                                                                       | T. Rich & S. Whild                                  | 2.99  | 4x = tetraploid |
| FC347  | <i>Sorbus margaretae</i> | Culbone                                                                                                                          | T. Rich                                             | 2.991 | 4x = tetraploid |
| FC348  | <i>Sorbus margaretae</i> | Culbone                                                                                                                          | T. Rich                                             | 3     | 4x = tetraploid |
| FC165  | <i>Sorbus minima</i>     | Craig y Castell                                                                                                                  | T. C. G. Rich                                       | 2.270 | 3x = triploid   |
| FC169  | <i>Sorbus minima</i>     | Craig y Cilau NNR                                                                                                                | T. C. G. Rich                                       | 2.296 | 3x = triploid   |
| FC172  | <i>Sorbus minima</i>     | Craig y Cilau NNR                                                                                                                | T. C. G. Rich                                       | 2.276 | 3x = triploid   |
| FC183  | <i>Sorbus minima</i>     | Craig y Cilau NNR                                                                                                                | T. C. G. Rich                                       | 2.258 | 3x = triploid   |
| FC380  | <i>Sorbus mougeotii</i>  | France. Bornes Aravis 1500 m.<br>Switzerland. Betlahstock, 47°13'N,<br>7°25'E, about 1100 m elevation, in<br>the Jura mountains. | M. Christenhusz                                     | 2.984 | 4x = tetraploid |
| FC381  | <i>Sorbus mougeotii</i>  |                                                                                                                                  | M. Christenhusz                                     | 2.961 | 4x = tetraploid |
| FC6482 | <i>Sorbus mougeotii</i>  | Col de la Pierre St Martin, Spain                                                                                                | M. J. M. Christenhusz, M.<br>Chase & M. Fay         | 3.072 | 4x = tetraploid |
| FC6483 | <i>Sorbus mougeotii</i>  | Col de la Pierre St Martin, Spain                                                                                                | M. J. M. Christenhusz, M.<br>Chase & M. Fay         | 3.022 | 4x = tetraploid |
| FC6484 | <i>Sorbus mougeotii</i>  | Col de la Pierre St Martin, Spain                                                                                                | M. J. M. Christenhusz, M.<br>Chase & M. Fay         | 3.055 | 4x = tetraploid |
| FC008  | <i>Sorbus not aria</i>   | The Gully, Clifton                                                                                                               | T. C. G. Rich, L. Houston, S.<br>Ludwig, I. Trotman | 2.284 | 3x = triploid   |
| FC083  | <i>Sorbus not aria</i>   | Seven Sisters, middle outcrop                                                                                                    | M. Fay, J. P. Moscardo, S.<br>Clermont, T. Rich     | 2.286 | 3x = triploid   |
| FC094  | <i>Sorbus not aria</i>   | Seven Sisters, cliff edge before<br>main outcrop                                                                                 | M. Fay, J. P. Moscardo, S.<br>Clermont, T. Rich     | 2.268 | 3x = triploid   |
| FC095  | <i>Sorbus not aria</i>   | Seven Sisters, cliff edge before<br>main outcrop                                                                                 | M. Fay, J. P. Moscardo, S.<br>Clermont, T. Rich     | 2.294 | 3x = triploid   |
| FC104  | <i>Sorbus not aria</i>   | Seven Sisters, main outcrop                                                                                                      | M. Fay, J. P. Moscardo, S.<br>Clermont, T. Rich     | 2.252 | 3x = triploid   |

|       |                               |                                              |                                              |       |               |
|-------|-------------------------------|----------------------------------------------|----------------------------------------------|-------|---------------|
| FC111 | Sorbus not aria               | Seven Sisters, east of main outcrop          | M. Fay, J. P. Moscardo, S. Clermont, T. Rich | 2.266 | 3x = triploid |
| FC114 | Sorbus not aria               | Seven Sisters, east of main outcrop          | M. Fay, J. P. Moscardo, S. Clermont, T. Rich | 2.266 | 3x = triploid |
| FC118 | Sorbus not aria               | Seven Sisters, east of main outcrop          | M. Fay, J. P. Moscardo, S. Clermont, T. Rich | 2.252 | 3x = triploid |
| FC359 | Sorbus not aria               | Shorn Cliff                                  | T. Rich & L. Houston                         | 2.224 | 3x = triploid |
| FC360 | Sorbus not aria               | Woodcroft Quarry                             | T. Rich & L. Houston                         | 2.251 | 3x = triploid |
| FC363 | Sorbus not aria               | Woodcroft Quarry                             | T. Rich & L. Houston                         | 2.276 | 3x = triploid |
| L045  | Sorbus not aria               | Jack's Hole, Clifton                         | L. Houston                                   | 2.27  | 3x = triploid |
| L072  | Sorbus not aria               | Cheddar Gorge S side, Gough's Cliffs, E      | L. Houston                                   | 2.252 | 3x = triploid |
| L142  | Sorbus not aria               | Burrington Combe                             | L. Houston                                   | 2.346 | 3x = triploid |
| L015  | Sorbus not eminens            | Cheddar, N side (NT reserve), Horseshoe Bend | L. Houston                                   | 2.236 | 3x = triploid |
| L067  | Sorbus not eminens            | Cheddar Gorge S side, coach park slopes      | L. Houston                                   | 2.31  | 3x = triploid |
| FC105 | Sorbus not eminentiformis     | Seven Sisters, main outcrop                  | M. Fay, J. P. Moscardo, S. Clermont, T. Rich | 2.289 | 3x = triploid |
| FC113 | Sorbus not eminentiformis     | Seven Sisters, east of main outcrop          | M. Fay, J. P. Moscardo, S. Clermont, T. Rich | 2.272 | 3x = triploid |
| FC140 | Sorbus not parviloba          | Coldwell Rocks, rock west of Ship Rock       | M. Fay, J. P. Moscardo, S. Clermont, T. Rich | 2.244 | 3x = triploid |
| FC143 | Sorbus not parviloba          | Coldwell Rocks, near Ship Rock               | M. Fay, J. P. Moscardo, S. Clermont, T. Rich | 2.251 | 3x = triploid |
| L023  | Sorbus Observatory Hill taxon | Observatory Hill, Clifton                    | L. Houston                                   | 2.286 | 3x = triploid |
| L024  | Sorbus Observatory Hill taxon | Observatory Hill, Clifton                    | L. Houston                                   | 2.261 | 3x = triploid |
| L025  | Sorbus Observatory Hill taxon | Observatory Hill, Clifton                    | L. Houston                                   | 2.254 | 3x = triploid |
| L026  | Sorbus Observatory Hill taxon | Observatory Hill, Clifton                    | L. Houston                                   | 2.27  | 3x = triploid |
| L027  | Sorbus Observatory Hill taxon | Observatory Hill, Clifton                    | L. Houston                                   | 2.25  | 3x = triploid |
| L031  | Sorbus Observatory Hill taxon | Observatory Hill, Clifton                    | L. Houston                                   | 2.234 | 3x = triploid |

|       |                                   |                                                        |                                              |       |                 |
|-------|-----------------------------------|--------------------------------------------------------|----------------------------------------------|-------|-----------------|
| L034  | Sorbus Observatory Hill taxon     | Observatory Hill, Clifton                              | L. Houston                                   | 2.224 | 3x = triploid   |
| L075  | Sorbus one-off form               | Cheddar Gorge S side, Gough's Top, W                   | L. Houston                                   | 2.274 | 3x = triploid   |
| L094  | Sorbus one-off form               | Cheddar Gorge S side, Gough's Cliffs W, 1st upper tier | L. Houston                                   | 3.003 | 4x = tetraploid |
| L131  | Sorbus one-off form               | Weston Big Wood: Valley Road                           | L. Houston                                   | 2.169 | 3x = triploid   |
| L038  | Sorbus one-off 'hedgehog'         | Quarry 2, Leigh Woods                                  | L. Houston                                   | 2.303 | 3x = triploid   |
| L090  | Sorbus one-off sharply lobed      | Cheddar Gorge S side, Gough's Cliffs W, 1st upper tier | L. Houston                                   | 2.986 | 4x = tetraploid |
| FC147 | Sorbus parviloba                  | Coldwell Rocks, Ship Rock                              | M. Fay, J. P. Moscardo, S. Clermont, T. Rich | 3.011 | 4x = tetraploid |
| FC303 | Sorbus porrigentiformis aggregate | details not traced (cultivated at NBGW)                | T. C. G. Rich                                | 3.011 | 4x = tetraploid |
| FC361 | Sorbus porrigentiformis aggregate | Woodcroft Quarry                                       | T. Rich & L. Houston                         | 2.258 | 3x = triploid   |
| FC364 | Sorbus porrigentiformis aggregate | Woodcroft Quarry                                       | T. Rich & L. Houston                         | 2.273 | 3x = triploid   |
| L091  | Sorbus porrigentiformis aggregate | Cheddar Gorge S side, Gough's Cliffs W, 1st upper tier | L. Houston                                   | 2.252 | 3x = triploid   |
| L093  | Sorbus porrigentiformis aggregate | Cheddar Gorge S side, Gough's Cliffs W, 1st upper tier | L. Houston                                   | 3.011 | 4x = tetraploid |
| L115  | Sorbus porrigentiformis aggregate | Cheddar Gorge, N (NT) side, Commoners' Spur            | L. Houston                                   | 2.287 | 3x = triploid   |
| L116  | Sorbus porrigentiformis aggregate | Cheddar Gorge, N (NT) side, Commoners' Spur            | L. Houston                                   | 3.001 | 4x = tetraploid |
| L124  | Sorbus porrigentiformis aggregate | Blaise Estate, Goram's Chair                           | L. Houston                                   | 2.998 | 4x = tetraploid |
| L135  | Sorbus                            | Burrington Combe                                       | L. Houston                                   | 2.258 | 3x = triploid   |

|       |                                                       |                   |               |       |                 |
|-------|-------------------------------------------------------|-------------------|---------------|-------|-----------------|
|       | porrigentiformis<br>aggregate<br>Sorbus               |                   |               |       |                 |
| L136  | porrigentiformis<br>aggregate<br>Sorbus               | Burrington Combe  | L. Houston    | 2.268 | 3x = triploid   |
| L137  | porrigentiformis<br>aggregate<br>Sorbus               | Burrington Combe  | L. Houston    | 3.037 | 4x = tetraploid |
| L138  | porrigentiformis<br>aggregate<br>Sorbus               | Burrington Combe  | L. Houston    | 2.269 | 3x = triploid   |
| L140  | porrigentiformis<br>aggregate<br>Sorbus               | Burrington Combe  | L. Houston    | 2.281 | 3x = triploid   |
| L141  | porrigentiformis<br>aggregate<br>Sorbus               | Burrington Combe  | L. Houston    | 2.301 | 3x = triploid   |
| L143  | porrigentiformis<br>aggregate<br>Sorbus               | Burrington Combe  | L. Houston    | 2.245 | 3x = triploid   |
| FC190 | porrigentiformis form<br>with narrow leaves<br>Sorbus | Craig y Cilau NNR | T. C. G. Rich | 3.807 | 5x = pentaploid |
| FC164 | porrigentiformis sensu<br>stricto<br>Sorbus           | Craig y Castell   | T. C. G. Rich | 2.974 | 4x = tetraploid |
| FC171 | porrigentiformis sensu<br>stricto<br>Sorbus           | Craig y Cilau NNR | T. C. G. Rich | 3.031 | 4x = tetraploid |
| FC176 | porrigentiformis sensu<br>stricto<br>Sorbus           | Craig y Cilau NNR | T. C. G. Rich | 3.056 | 4x = tetraploid |
| FC191 | porrigentiformis sensu<br>stricto<br>Sorbus           | Craig y Cilau NNR | T. C. G. Rich | 2.967 | 4x = tetraploid |
| FC192 | porrigentiformis sensu<br>stricto                     | Craig y Cilau NNR | T. C. G. Rich | 2.990 | 4x = tetraploid |

|       |                                             |                                                                         |                    |       |                 |
|-------|---------------------------------------------|-------------------------------------------------------------------------|--------------------|-------|-----------------|
| FC207 | Sorbus<br>porrigentiformis sensu<br>stricto | Castell Coch, below                                                     | T. C. G. Rich      | 2.955 | 4x = tetraploid |
| FC212 | Sorbus<br>porrigentiformis sensu<br>stricto | Pwll-du Quarry, Govilon                                                 | T. C. G. Rich      | 3.016 | 4x = tetraploid |
| FC301 | Sorbus<br>porrigentiformis sensu<br>stricto | Craig y Cilau, Llangattock<br>(cultivated at NBGW)                      | T. C. G. Rich      | 3.01  | 4x = tetraploid |
| FC306 | Sorbus<br>porrigentiformis sensu<br>stricto | Stokeleigh Camp, Leigh Woods,<br>Bristol v.c.34 (cultivated at<br>NBGW) | T. C. G. Rich      | 3.015 | 4x = tetraploid |
| FC335 | Sorbus<br>porrigentiformis sensu<br>stricto | Fisherman's car park, Watersmeet                                        | T. Rich & S. Whild | 3.075 | 4x = tetraploid |
| L039  | Sorbus<br>porrigentiformis sensu<br>stricto | Quarry 2, Leigh Woods                                                   | L. Houston         | 3.024 | 4x = tetraploid |
| L040  | Sorbus<br>porrigentiformis sensu<br>stricto | Quarry 2, Leigh Woods                                                   | L. Houston         | 3.029 | 4x = tetraploid |
| L041  | Sorbus<br>porrigentiformis sensu<br>stricto | Quarry 2, Leigh Woods                                                   | L. Houston         | 3.036 | 4x = tetraploid |
| L044  | Sorbus<br>porrigentiformis sensu<br>stricto | Jack's Hole, Clifton                                                    | L. Houston         | 3.039 | 4x = tetraploid |
| L046  | Sorbus<br>porrigentiformis sensu<br>stricto | Cheddar Gorge S side, Gough's<br>Cliffs, Rock-sport spur                | L. Houston         | 3.032 | 4x = tetraploid |
| L050  | Sorbus<br>porrigentiformis sensu<br>stricto | Cheddar Gorge S side, Gough's<br>Cliffs, N of Caves offices             | L. Houston         | 3.04  | 4x = tetraploid |
| L069  | Sorbus<br>porrigentiformis sensu<br>stricto | Cheddar Gorge S side, Gough's<br>Cliffs, E                              | L. Houston         | 3.042 | 4x = tetraploid |
| L074  | Sorbus<br>porrigentiformis sensu<br>stricto | Cheddar Gorge S side, Gough's<br>Cliffs, E                              | L. Houston         | 2.994 | 4x = tetraploid |

|       |                                                                     |                                                  |                                                 |       |                 |
|-------|---------------------------------------------------------------------|--------------------------------------------------|-------------------------------------------------|-------|-----------------|
| L077  | Sorbus<br>porrigentiformis sensu<br>stricto                         | Cheddar Gorge S side, Gough's top,<br>E          | L. Houston                                      | 3.008 | 4x = tetraploid |
| L089  | Sorbus<br>porrigentiformis sensu<br>stricto                         | Heale Ladder, Tom Tivey's Hole                   | L. Houston                                      | 3.03  | 4x = tetraploid |
| FC185 | Sorbus<br>porrigentiformis sensu<br>stricto (Small leaved<br>form?) | Craig y Cilau NNR                                | T. C. G. Rich                                   | 2.998 | 4x = tetraploid |
| FC188 | Sorbus<br>porrigentiformis sensu<br>stricto (Small leaved<br>form?) | Craig y Cilau NNR                                | T. C. G. Rich                                   | 3.065 | 4x = tetraploid |
| FC194 | Sorbus<br>porrigentiformis sensu<br>stricto (Small leaved<br>form?) | Craig y Cilau NNR                                | T. C. G. Rich                                   | 2.989 | 4x = tetraploid |
| FC088 | Sorbus<br>porrigentiformis<br>Symonds Yat triploid<br>clone         | Seven Sisters, small hidden outcrop              | M. Fay, J. P. Moscardo, S.<br>Clermont, T. Rich | 2.280 | 3x = triploid   |
| FC090 | Sorbus<br>porrigentiformis<br>Symonds Yat triploid<br>clone         | Seven Sisters, small hidden outcrop              | M. Fay, J. P. Moscardo, S.<br>Clermont, T. Rich | 2.241 | 3x = triploid   |
| FC099 | Sorbus<br>porrigentiformis<br>Symonds Yat triploid<br>clone         | Seven Sisters, cliff edge before<br>main outcrop | M. Fay, J. P. Moscardo, S.<br>Clermont, T. Rich | 2.285 | 3x = triploid   |
| FC101 | Sorbus<br>porrigentiformis<br>Symonds Yat triploid<br>clone         | Seven Sisters, cliff edge before<br>main outcrop | M. Fay, J. P. Moscardo, S.<br>Clermont, T. Rich | 2.249 | 3x = triploid   |
| FC115 | Sorbus<br>porrigentiformis<br>Symonds Yat triploid<br>clone         | Seven Sisters, east of main outcrop              | M. Fay, J. P. Moscardo, S.<br>Clermont, T. Rich | 2.259 | 3x = triploid   |

|       |                                                             |                                                |                                                                |       |                 |
|-------|-------------------------------------------------------------|------------------------------------------------|----------------------------------------------------------------|-------|-----------------|
| FC130 | Sorbus<br>porrigentiformis<br>Symonds Yat triploid<br>clone | Symonds Yat viewpoint by café                  | M. Fay, J. P. Moscardo, S.<br>Clermont, T. Rich                | 2.263 | 3x = triploid   |
| FC132 | Sorbus<br>porrigentiformis<br>Symonds Yat triploid<br>clone | Symonds Yat cleared viewpoint<br>north of café | M. Fay, J. P. Moscardo, S.<br>Clermont, T. Rich                | 2.249 | 3x = triploid   |
| FC139 | Sorbus<br>porrigentiformis<br>Symonds Yat triploid<br>clone | Coldwell Rocks, rock west of Ship<br>Rock      | M. Fay, J. P. Moscardo, S.<br>Clermont, T. Rich                | 2.269 | 3x = triploid   |
| FC141 | Sorbus<br>porrigentiformis<br>Symonds Yat triploid<br>clone | Coldwell Rocks, rock west of Ship<br>Rock      | M. Fay, J. P. Moscardo, S.<br>Clermont, T. Rich                | 2.271 | 3x = triploid   |
| FC148 | Sorbus<br>porrigentiformis<br>Symonds Yat triploid<br>clone | Coldwell Rocks, Ship Rock                      | M. Fay, J. P. Moscardo, S.<br>Clermont, T. Rich                | 2.259 | 3x = triploid   |
| FC149 | Sorbus<br>porrigentiformis<br>Symonds Yat triploid<br>clone | Coldwell Rocks, Ship Rock                      | M. Fay, J. P. Moscardo, S.<br>Clermont, T. Rich                | 2.266 | 3x = triploid   |
| FC025 | Sorbus Portishead<br>taxon                                  | Kilkenny Bay, Portishead                       | L. Houston, M. Fay, J. P.<br>Moscardo, S. Clermont, T.<br>Rich | 3.009 | 4x = tetraploid |
| FC026 | Sorbus Portishead<br>taxon                                  | Kilkenny Bay, Portishead                       | L. Houston, M. Fay, J. P.<br>Moscardo, S. Clermont, T.<br>Rich | 3.008 | 4x = tetraploid |
| FC027 | Sorbus Portishead<br>taxon                                  | Kilkenny Bay, Portishead                       | L. Houston, M. Fay, J. P.<br>Moscardo, S. Clermont, T.<br>Rich | 3.003 | 4x = tetraploid |
| FC029 | Sorbus Portishead<br>taxon                                  | Kilkenny Bay, Portishead                       | L. Houston, M. Fay, J. P.<br>Moscardo, S. Clermont, T.<br>Rich | 3.011 | 4x = tetraploid |
| FC030 | Sorbus Portishead<br>taxon                                  | Kilkenny Bay, Portishead                       | L. Houston, M. Fay, J. P.<br>Moscardo, S. Clermont, T.<br>Rich | 3.044 | 4x = tetraploid |

|       |                         |                          |                                                          |       |                 |
|-------|-------------------------|--------------------------|----------------------------------------------------------|-------|-----------------|
| FC031 | Sorbus Portishead taxon | Kilkenny Bay, Portishead | L. Houston, M. Fay, J. P. Moscardo, S. Clermont, T. Rich | 3.031 | 4x = tetraploid |
| FC032 | Sorbus Portishead taxon | Kilkenny Bay, Portishead | L. Houston, M. Fay, J. P. Moscardo, S. Clermont, T. Rich | 3.028 | 4x = tetraploid |
| FC033 | Sorbus Portishead taxon | Kilkenny Bay, Portishead | L. Houston, M. Fay, J. P. Moscardo, S. Clermont, T. Rich | 2.994 | 4x = tetraploid |
| FC034 | Sorbus Portishead taxon | Kilkenny Bay, Portishead | L. Houston, M. Fay, J. P. Moscardo, S. Clermont, T. Rich | 2.973 | 4x = tetraploid |
| FC035 | Sorbus Portishead taxon | Redcliff Bay, Portishead | L. Houston, M. Fay, J. P. Moscardo, S. Clermont, T. Rich | 3.043 | 4x = tetraploid |
| FC036 | Sorbus Portishead taxon | Redcliff Bay, Portishead | L. Houston, M. Fay, J. P. Moscardo, S. Clermont, T. Rich | 3.011 | 4x = tetraploid |
| FC037 | Sorbus Portishead taxon | Redcliff Bay, Portishead | L. Houston, M. Fay, J. P. Moscardo, S. Clermont, T. Rich | 2.998 | 4x = tetraploid |
| FC040 | Sorbus Portishead taxon | Church Hill, Clevedon    | L. Houston, M. Fay, J. P. Moscardo, S. Clermont, T. Rich | 3.016 | 4x = tetraploid |
| FC041 | Sorbus Portishead taxon | Church Hill, Clevedon    | L. Houston, M. Fay, J. P. Moscardo, S. Clermont, T. Rich | 3.008 | 4x = tetraploid |
| FC042 | Sorbus Portishead taxon | Church Hill, Clevedon    | L. Houston, M. Fay, J. P. Moscardo, S. Clermont, T. Rich | 3.059 | 4x = tetraploid |
| FC043 | Sorbus Portishead taxon | Church Hill, Clevedon    | L. Houston, M. Fay, J. P. Moscardo, S. Clermont, T. Rich | 3.081 | 4x = tetraploid |
| FC044 | Sorbus Portishead taxon | Church Hill, Clevedon    | L. Houston, M. Fay, J. P. Moscardo, S. Clermont, T. Rich | 2.963 | 4x = tetraploid |
| FC045 | Sorbus Portishead taxon | Church Hill, Clevedon    | L. Houston, M. Fay, J. P. Moscardo, S. Clermont, T. Rich | 3.032 | 4x = tetraploid |



|       |                                   |                                                                                                    |                                                          |       |                 |
|-------|-----------------------------------|----------------------------------------------------------------------------------------------------|----------------------------------------------------------|-------|-----------------|
| FC064 | <i>Sorbus Portishead</i><br>taxon | East Wood, Portishead                                                                              | L. Houston, M. Fay, J. P. Moscardo, S. Clermont, T. Rich | 3.000 | 4x = tetraploid |
| FC386 | <i>Sorbus prattii</i>             | unknown                                                                                            | M. Christenhusz                                          | 3.035 | 4x = tetraploid |
| FC102 | <i>Sorbus rupicola</i>            | Seven Sisters, main outcrop tip                                                                    | M. Fay, J. P. Moscardo, S. Clermont, T. Rich             | 3.041 | 4x = tetraploid |
| FC106 | <i>Sorbus rupicola</i>            | Seven Sisters, main outcrop north side                                                             | M. Fay, J. P. Moscardo, S. Clermont, T. Rich             | 3.054 | 4x = tetraploid |
| FC168 | <i>Sorbus rupicola</i>            | Craig y Cilau NNR                                                                                  | T. C. G. Rich                                            | 3.081 | 4x = tetraploid |
| FC173 | <i>Sorbus rupicola</i>            | Craig y Cilau NNR                                                                                  | T. C. G. Rich                                            | 3.097 | 4x = tetraploid |
| FC174 | <i>Sorbus rupicola</i>            | Craig y Cilau NNR                                                                                  | T. C. G. Rich                                            | 3.073 | 4x = tetraploid |
| FC197 | <i>Sorbus rupicola</i>            | Penmoelallt                                                                                        | T. C. G. Rich                                            | 3.091 | 4x = tetraploid |
| FC203 | <i>Sorbus rupicola</i>            | Penmoelallt                                                                                        | T. C. G. Rich                                            | 3.081 | 4x = tetraploid |
| FC205 | <i>Sorbus rupicola</i>            | Penmoelallt                                                                                        | T. C. G. Rich                                            | 3.093 | 4x = tetraploid |
| FC315 | <i>Sorbus rupicola</i>            | Neck Wood, Trentishoe                                                                              | T. Rich & S. Whild                                       | 3.036 | 4x = tetraploid |
| FC320 | <i>Sorbus rupicola</i>            | Neck Wood, Trentishoe                                                                              | T. Rich & S. Whild                                       | 3.036 | 4x = tetraploid |
| L053  | <i>Sorbus rupicoloides</i>        | Cheddar Gorge S side, Gough's Cliffs, above offices                                                | L. Houston                                               | 3.049 | 4x = tetraploid |
| L059  | <i>Sorbus rupicoloides</i>        | Cheddar Gorge S side, Gough's Cliffs, above Caves complex                                          | L. Houston                                               | 2.996 | 4x = tetraploid |
| L061  | <i>Sorbus rupicoloides</i>        | Cheddar Gorge S side, Gough's Cliffs, above Caves complex                                          | L. Houston                                               | 2.995 | 4x = tetraploid |
| FC390 | <i>Sorbus sambucifolia</i>        | Japan. Hokkaido, Rumoi District. Teshio Experimental Forest of Hokkaido University, Mukaihassen 12 | M. Christenhusz                                          | 1.565 | 2x = diploid    |
| FC078 | <i>Sorbus saxicola</i>            | Lords Wood, Great Doward                                                                           | M. Fay, J. P. Moscardo, S. Clermont, T. Rich             | 2.247 | 3x = triploid   |
| FC079 | <i>Sorbus saxicola</i>            | King Arthurs Cave, Lords Wood, Great Doward                                                        | M. Fay, J. P. Moscardo, S. Clermont, T. Rich             | 2.252 | 3x = triploid   |
| FC129 | <i>Sorbus saxicola</i>            | Symonds Yat viewpoint by café                                                                      | M. Fay, J. P. Moscardo, S. Clermont, T. Rich             | 2.243 | 3x = triploid   |
| FC374 | <i>Sorbus sibirica</i>            | Russia. Sakha Republic (Yakutia), near Yakutsk                                                     | M. Christenhusz                                          | 2.882 | 4x = tetraploid |
| FC213 | <i>Sorbus stenophylla</i>         | Pwll-du Quarry, Govilon                                                                            | T. C. G. Rich                                            | 3.693 | 5x = pentaploid |

|       |                                                   |                                     |                                                        |       |                 |
|-------|---------------------------------------------------|-------------------------------------|--------------------------------------------------------|-------|-----------------|
| FC214 | <i>Sorbus stenophylla</i>                         | Pwll-du Quarry, Govilon             | T. C. G. Rich                                          | 3.73  | 5x = pentaploid |
| FC215 | <i>Sorbus stenophylla</i>                         | Pwll-du Quarry, Govilon             | T. C. G. Rich                                          | 3.704 | 5x = pentaploid |
| FC391 | <i>Sorbus stenophylla</i>                         | Darren Lwyd                         | T. C. G. Rich                                          | 3.702 | 5x = pentaploid |
| FC392 | <i>Sorbus stenophylla</i>                         | Darren Lwyd                         | T. C. G. Rich                                          | 3.653 | 5x = pentaploid |
| FC321 | <i>Sorbus subcuneata</i>                          | Neck Wood, Trentishoe               | T. Rich & S. Whild                                     | 2.329 | 3x = triploid   |
| FC323 | <i>Sorbus subcuneata</i>                          | Neck Wood, Trentishoe               | T. Rich & S. Whild                                     | 2.317 | 3x = triploid   |
| FC324 | <i>Sorbus subcuneata</i>                          | Invention Wood, Hunter's Inn, track | T. Rich & S. Whild                                     | 2.346 | 3x = triploid   |
| FC328 | <i>Sorbus subcuneata</i>                          | Woody Bay                           | T. Rich & S. Whild                                     | 2.34  | 3x = triploid   |
| FC332 | <i>Sorbus subcuneata</i>                          | Woody Bay                           | T. Rich                                                | 2.359 | 3x = triploid   |
| FC334 | <i>Sorbus subcuneata</i>                          | Woody Bay                           | T. Rich                                                | 2.363 | 3x = triploid   |
| FC337 | <i>Sorbus subcuneata</i>                          | Fisherman's car park, Watersmeet    | T. Rich & S. Whild                                     | 2.368 | 3x = triploid   |
| FC341 | <i>Sorbus subcuneata</i>                          | Watersmeet                          | T. Rich & S. Whild                                     | 2.368 | 3x = triploid   |
| FC342 | <i>Sorbus subcuneata</i>                          | Watersmeet                          | T. Rich & S. Whild                                     | 2.363 | 3x = triploid   |
| FC344 | <i>Sorbus subcuneata</i>                          | Watersmeet                          | T. Rich & S. Whild                                     | 2.363 | 3x = triploid   |
| FC346 | <i>Sorbus subcuneata</i>                          | Culbone                             | T. Rich                                                | 2.37  | 3x = triploid   |
| FC349 | <i>Sorbus subcuneata</i>                          | Minehead, Church Road               | T. Rich & S. Whild                                     | 2.275 | 3x = triploid   |
| FC134 | <i>Sorbus tomentella</i> or<br><i>croceocarpa</i> | Yat Rock                            | M. Fay, J. P. Moscardo, S.<br>Clermont, T. Rich        | 3.076 | 4x = tetraploid |
| FC089 | <i>Sorbus tomentella-aria</i><br>backcross        | Seven Sisters, small hidden outcrop | M. Fay, J. P. Moscardo, S.<br>Clermont, T. Rich        | 2.234 | 3x = triploid   |
| FC091 | <i>Sorbus tomentella-aria</i><br>backcross        | Seven Sisters, small hidden outcrop | M. Fay, J. P. Moscardo, S.<br>Clermont, T. Rich        | 2.270 | 3x = triploid   |
| FC122 | <i>Sorbus tomentella-aria</i><br>backcross        | Symonds Yat, west side              | M. Fay, J. P. Moscardo, S.<br>Clermont, T. Rich        | 2.266 | 3x = triploid   |
| FC124 | <i>Sorbus tomentella-aria</i><br>backcross        | Symonds Yat, west side              | M. Fay, J. P. Moscardo, S.<br>Clermont, T. Rich        | 2.254 | 3x = triploid   |
| FC126 | <i>Sorbus tomentella-aria</i><br>backcross        | Symonds Yat, west side              | M. Fay, J. P. Moscardo, S.<br>Clermont, T. Rich        | 2.265 | 3x = triploid   |
| FC127 | <i>Sorbus tomentella-aria</i><br>backcross        | Symonds Yat, west side              | M. Fay, J. P. Moscardo, S.<br>Clermont, T. Rich        | 2.246 | 3x = triploid   |
| FC136 | <i>Sorbus tomentella-aria</i><br>backcross        | Symonds Yat, east side              | M. Fay, J. P. Moscardo, S.<br>Clermont, T. Rich        | 2.258 | 3x = triploid   |
| FC065 | <i>Sorbus torminalis</i>                          | East Wood, Portishead               | L. Houston, M. Fay, J. P.<br>Moscardo, S. Clermont, T. | 1.616 | 2x = diploid    |

|       |                                         |                                               | Rich                                                     |       |                 |
|-------|-----------------------------------------|-----------------------------------------------|----------------------------------------------------------|-------|-----------------|
| FC068 | <i>Sorbus torminalis</i>                | East Wood, Portishead                         | L. Houston, M. Fay, J. P. Moscardo, S. Clermont, T. Rich | 1.595 | 2x = diploid    |
| FC075 | <i>Sorbus torminalis</i>                | Lords Wood, Great Doward                      | M. Fay, J. P. Moscardo, S. Clermont, T. Rich             | 1.607 | 2x = diploid    |
| FC076 | <i>Sorbus torminalis</i>                | Lords Wood, Great Doward                      | M. Fay, J. P. Moscardo, S. Clermont, T. Rich             | 1.614 | 2x = diploid    |
| FC077 | <i>Sorbus torminalis</i>                | Lords Wood, Great Doward                      | M. Fay, J. P. Moscardo, S. Clermont, T. Rich             | 1.614 | 2x = diploid    |
| FC080 | <i>Sorbus torminalis</i>                | Seven Sisters, northern outcrop               | M. Fay, J. P. Moscardo, S. Clermont, T. Rich             | 1.595 | 2x = diploid    |
| FC087 | <i>Sorbus torminalis</i>                | Seven Sisters, behind middle outcrop          | M. Fay, J. P. Moscardo, S. Clermont, T. Rich             | 1.609 | 2x = diploid    |
| FC096 | <i>Sorbus torminalis</i>                | Seven Sisters, cliff edge before main outcrop | M. Fay, J. P. Moscardo, S. Clermont, T. Rich             | 1.625 | 2x = diploid    |
| FC117 | <i>Sorbus torminalis</i>                | Seven Sisters, east of main outcrop           | M. Fay, J. P. Moscardo, S. Clermont, T. Rich             | 1.597 | 2x = diploid    |
| FC120 | <i>Sorbus torminalis</i>                | Symonds Yat, west side                        | M. Fay, J. P. Moscardo, S. Clermont, T. Rich             | 1.616 | 2x = diploid    |
| FC144 | <i>Sorbus torminalis</i>                | Coldwell Rocks, near Ship Rock                | M. Fay, J. P. Moscardo, S. Clermont, T. Rich             | 1.631 | 2x = diploid    |
| FC153 | <i>Sorbus torminalis</i>                | Symonds Yat, car park                         | M. Fay, J. P. Moscardo, S. Clermont, T. Rich             | 1.605 | 2x = diploid    |
| FC208 | <i>Sorbus torminalis</i>                | Castell Coch, below                           | T. C. G. Rich                                            | 1.628 | 2x = diploid    |
| FC355 | <i>Sorbus torminalis</i>                | Offa's Dyke, Tidenham                         | T. Rich & L. Houston                                     | 1.614 | 2x = diploid    |
| FC316 | <i>Sorbus vexans</i>                    | Neck Wood, Trentishoe                         | T. Rich & S. Whild                                       | 3.012 | 4x = tetraploid |
| FC317 | <i>Sorbus vexans</i>                    | Neck Wood, Trentishoe                         | T. Rich & S. Whild                                       | 2.994 | 4x = tetraploid |
| FC318 | <i>Sorbus vexans</i>                    | Neck Wood, Trentishoe                         | T. Rich & S. Whild                                       | 3.013 | 4x = tetraploid |
| FC329 | <i>Sorbus vexans</i>                    | Woody Bay                                     | T. Rich & S. Whild                                       | 3.031 | 4x = tetraploid |
| FC336 | <i>Sorbus vexans</i>                    | Fisherman's car park, Watersmeet              | T. Rich & S. Whild                                       | 3.074 | 4x = tetraploid |
| FC003 | <i>Sorbus wilmottiana</i>               | The Gully, Clifton                            | T. C. G. Rich, L. Houston, S. Ludwig, I. Trotman         | 2.278 | 3x = triploid   |
| L042  | <i>Sorbus wilmottiana</i> or its hybrid | Quarry 4, Leigh Woods                         | L. Houston                                               | 2.275 | 3x = triploid   |
| L037  | <i>Sorbus x avonensis</i>               | Avon Gorge, St Vincent's Rocks                | L. Houston                                               | 2.294 | 3x = triploid   |

| South, Clifton |                                               |                                                             |                                                 |       |                 |
|----------------|-----------------------------------------------|-------------------------------------------------------------|-------------------------------------------------|-------|-----------------|
| L133           | <i>Sorbus x avonensis</i>                     | Avon Gorge, vc 6: Leigh Woods<br>towpath                    | L. Houston                                      | 2.211 | 3x = triploid   |
| L012           | <i>Sorbus x houstoniae</i>                    | Leigh Woods, Stokeleigh Cliffs                              | L. Houston                                      | 3.072 | 4x = tetraploid |
| FC368          | <i>Sorbus x liljeforsii</i>                   | Bradford, Powell Rd embankment                              | M. Wilcox                                       | 2.349 | 3x = triploid   |
| FC199          | <i>Sorbus x motleyi</i>                       | Penmoelallt                                                 | T. C. G. Rich                                   | 3.031 | 4x = tetraploid |
| FC200          | <i>Sorbus x motleyi</i>                       | Penmoelallt                                                 | T. C. G. Rich                                   | 3.032 | 4x = tetraploid |
| FC201          | <i>Sorbus x motleyi</i>                       | Penmoelallt                                                 | T. C. G. Rich                                   | 3.055 | 4x = tetraploid |
| L123           | <i>Sorbus x robertsonii</i><br>(grafted)      | Avon Gorge, Clifton side<br>(University of Bristol Bot Gdn) | L. Houston<br>T. C. G. Rich, L. Houston, S.     | 2.271 | 3x = triploid   |
| FC001          | <i>Sorbus x thuringiaca</i>                   | The Plain, Leigh Woods                                      | Ludwig, I. Trotman                              | 1.505 | 2x = diploid    |
| FC367          | <i>Sorbus x thuringiaca</i><br>nm pinnatifida | Bolton Wood Quarry, Bradford                                | M. Wilcox                                       | 3.104 | 4x = tetraploid |
| FC121          | <i>Sorbus x tomentella</i>                    | Symonds Yat, west side                                      | M. Fay, J. P. Moscardo, S.<br>Clermont, T. Rich | 1.560 | 2x = diploid    |
| FC135          | <i>Sorbus x tomentella</i>                    | Symonds Yat, east side                                      | M. Fay, J. P. Moscardo, S.<br>Clermont, T. Rich | 1.542 | 2x = diploid    |
| FC152          | <i>Sorbus x tomentella</i>                    | Coldwell Rocks, Ship Rock                                   | M. Fay, J. P. Moscardo, S.<br>Clermont, T. Rich | 1.556 | 2x = diploid    |
| FC350          | <i>Sorbus x tomentella</i>                    | Gorrashill Wood                                             | T. Rich                                         | 1.551 | 2x = diploid    |
